# Supplementary material for: Transcutaneous electrical acupoint stimulation (TEAS) for cancer-related fatigue: study protocol for a systematic review and meta-analysis
Source: PubMed Central journal article supplement — BMJ Open. 2021 Nov 24;11(11):e049318. doi: 10.1136/bmjopen-2021-049318 (PMC8614145; doi:10.1136/bmjopen-2021-049318), 2021-11-24
Supplement: bmjopen-2021-049318.draft_revisions.pdf [file bmjopen-2021-049318.draft_revisions.pdf]

# BMJ Open

BMJ Open is committed to open peer review. As part of this commitment we make the peer review history of every article we publish publicly available.

When an article is published we post the peer reviewers' comments and the authors' responses online. We also post the versions of the paper that were used during peer review. These are the versions that the peer review comments apply to.

The versions of the paper that follow are the versions that were submitted during the peer review process. They are not the versions of record or the final published versions. They should not be cited or distributed as the published version of this manuscript.

BMJ Open is an open access journal and the full, final, typeset and author-corrected version of record of the manuscript is available on our site with no access controls, subscription charges or pay-per-view fees (<http://bmjopen.bmj.com>).

If you have any questions on BMJ Open's open peer review process please email [info.bmjopen@bmj.com](mailto:info.bmjopen@bmj.com)

# BMJ Open

## Transcutaneous electrical acupoint stimulation (TEAS) for cancer-related fatigue: study protocol for a systematic review and meta-analysis

|                               |                                                                                                                                                                                                                                                                                                             |
|-------------------------------|-------------------------------------------------------------------------------------------------------------------------------------------------------------------------------------------------------------------------------------------------------------------------------------------------------------|
| Journal:                      | <i>BMJ Open</i>                                                                                                                                                                                                                                                                                             |
| Manuscript ID                 | bmjopen-2021-049318                                                                                                                                                                                                                                                                                         |
| Article Type:                 | Protocol                                                                                                                                                                                                                                                                                                    |
| Date Submitted by the Author: | 25-Jan-2021                                                                                                                                                                                                                                                                                                 |
| Complete List of Authors:     | Zeng, YiWei; Chengdu University of TCM, School of Acupuncture and Tuina<br>Xia, Jialin; Chengdu University of TCM, School of Nursing<br>Chen, Zhihan; Chengdu University of Traditional Chinese Medicine, Acupuncture and Tuina school<br>Ren, Yulan; Chengdu University of TCM, School of Chinese Classics |
| Keywords:                     | COMPLEMENTARY MEDICINE, Adult oncology < ONCOLOGY, Public health < INFECTIOUS DISEASES                                                                                                                                                                                                                      |
|                               |                                                                                                                                                                                                                                                                                                             |

SCHOLARONE™  
Manuscripts

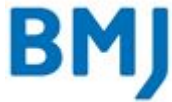

I, the Submitting Author has the right to grant and does grant on behalf of all authors of the Work (as defined in the below author licence), an exclusive licence and/or a non-exclusive licence for contributions from authors who are: i) UK Crown employees; ii) where BMJ has agreed a CC-BY licence shall apply, and/or iii) in accordance with the terms applicable for US Federal Government officers or employees acting as part of their official duties; on a worldwide, perpetual, irrevocable, royalty-free basis to BMJ Publishing Group Ltd ("BMJ") its licensees and where the relevant Journal is co-owned by BMJ to the co-owners of the Journal, to publish the Work in this journal and any other BMJ products and to exploit all rights, as set out in our [licence](#).

The Submitting Author accepts and understands that any supply made under these terms is made by BMJ to the Submitting Author unless you are acting as an employee on behalf of your employer or a postgraduate student of an affiliated institution which is paying any applicable article publishing charge ("APC") for Open Access articles. Where the Submitting Author wishes to make the Work available on an Open Access basis (and intends to pay the relevant APC), the terms of reuse of such Open Access shall be governed by a Creative Commons licence – details of these licences and which [Creative Commons](#) licence will apply to this Work are set out in our licence referred to above.

Other than as permitted in any relevant BMJ Author's Self Archiving Policies, I confirm this Work has not been accepted for publication elsewhere, is not being considered for publication elsewhere and does not duplicate material already published. I confirm all authors consent to publication of this Work and authorise the granting of this licence.

# Transcutaneous electrical acupoint stimulation (TEAS) for cancer-related fatigue: study protocol for a systematic review and meta-analysis

Yiwei Zeng<sup>1</sup>, Jialin Xia<sup>2</sup>, Zhihan Chen<sup>1</sup>, Yulan Ren<sup>3</sup>

<sup>1</sup> School of acupuncture and Tuina, Chengdu University of Traditional Chinese Medicine, Chengdu, China

<sup>2</sup> School of nursing, Chengdu University of Traditional Chinese Medicine, Chengdu, China

<sup>3</sup> School of Chinese Classics, Chengdu University of Traditional Chinese Medicine, Chengdu, China

## Correspondence to

Prof. Yulan Ren, School of Chinese Classics, Chengdu University of Traditional Chinese Medicine, Chengdu 610075, China; Renxg2468@163.com

## Abstract

**Introduction:** Cancer-related fatigue (CRF) is a prevalent symptom in cancer survivors. Since the limitations of current clinical management, like low adherence and adverse events, transcutaneous electrical acupoint stimulation (TEAS) may be a promising therapy for CRF. There have been currently some clinical trials conducted to evaluate the efficacy of TEAS on CRF patients but no systematic review has been conducted. We here design this study to assess the efficacy and safety of TEAS for CRF.

**Methods and analysis:** CENTRAL, Medline, Embase, ClinicalTrials.gov, World Health Organization International Clinical Trial Registry Platform and two China databases (CNKI and CBM) will be searched from inception to 31 January 2021 without language limitations. The selection of studies, data extraction and assessment of risk of bias will be conducted independently by two review authors. Meta-analysis will be performed using RevMan 5.4.1.

**Ethics and dissemination:** The results of this systematic review and meta-analysis will be disseminated in a manner of publication on a peer-reviewed journal. The data that will be used will not contain private information of participants so that there is no ethical approval required.

**Keywords:** Cancer-related fatigue; Transcutaneous electrical acupoint stimulation; Meta-analysis; Protocol.

**PROSPERO registration number:** CRD42020220282

## Strength and limitations of this study

This will be the first systematic review and meta-analysis conducted to evaluate the

1  
2  
3 efficacy of transcutaneous electrical acupoint stimulation (TEAS) for cancer-related  
4 fatigue (CRF).  
5

6 This study will provide more reliable evidence for TEAS in clinical CRF management  
7 in that most of the RCTs on TEAS for CRF have small sample size.  
8

9 The reliability of this study depends to a large extent on the methodological quality of  
10 included studies, and since only English and Chinese databases will be searched,  
11 language bias may not be avoided.  
12  
13

## 14 **Introduction**

15  
16 Cancer-related fatigue (CRF), defined as a distressing, persistent and subjective sense  
17 of tiredness or exhaustion that could not be alleviated by sleep or rest, is a common  
18 symptom in cancer survivors<sup>1</sup> and is nearly universal in those receiving anti-cancer  
19 treatments<sup>2</sup>. Some epidemiological studies have shown that the prevalence rates of the  
20 symptom ranged from 59% to 100%<sup>3</sup>. It inflicts negative impact on many aspects of  
21 patients' daily life<sup>4 5</sup>, and often causes treatment discontinuation and reduction of  
22 overall quality of life even of survival period.  
23

24 CRF is not just an isolated symptom, but a component of a syndrome including anxiety,  
25 depression, insomnia, etc<sup>6</sup>., and is multi-factorial involving anemia, inflammation-  
26 mediated changes of cytokines, cellular immunity regulation disorder, oxidative-stress-  
27 induced striated muscle dysfunction mediated by cancer or chemotherapeutic agents<sup>4 7</sup>  
28 <sup>8</sup>. It is often underestimated, under-diagnosed and mal-administrated in clinical  
29 practice<sup>9</sup>. Though many interventions including both the pharmacological and the non-  
30 pharmacological have been applied in clinical management<sup>10</sup>, a meta-analysis has  
31 shown that compared with non-pharmaceutical therapy, drugs have yield poorer effects  
32 on CRF<sup>11</sup> not to mention its high risk of side-effects. There is still no gold standard for  
33 CRF management<sup>12</sup>, therefore, an effective and safe treatment for CRF remains an  
34 urgent need in clinical practice.  
35

36 The use of Traditional Chinese medicine (TCM) is prevalent on cancer survivors in  
37 China and is accepted worldwide by its efficacy<sup>13</sup>. Acupuncture is an important part of  
38 TCM and some clinical trials have shown that acupuncture could provide clinical  
39 benefit for patients with CRF<sup>14</sup>. However, as an invasive method, acupuncture would  
40 probably be refused by many patients due to the experience of pain resulting in  
41 decreased adherence. Transcutaneous electrical acupoint stimulation (TEAS) is a  
42 noninvasive alternative to acupuncture, which combines transcutaneous electrical nerve  
43 stimulation and acupoints stimulation. It works, in the light of meridian theory, by  
44 stimulating acupoints on the surface with low-voltage pulses close to the body's  
45 bioelectricity<sup>15</sup>. At present, this technology has been applied in dealing with varieties  
46 of cancer-related symptoms including fatigue, immunosuppression and bone marrow  
47 suppression<sup>16-18</sup>. It has been confirmed to be with equal efficacy to acupuncture<sup>19</sup>. Thus,  
48  
49  
50  
51  
52  
53  
54  
55  
56  
57  
58  
59  
60

TEAS may have the same efficacy on CRF management as acupuncture with fewer risks. There have been currently some clinical trials conducted to evaluate the efficacy of TEAS on CRF patients but no systematic review to assess the clinical evidence.

## Objective

The aim of this systematic review is to critically assess the efficacy and safety of transcutaneous electrical acupoint stimulation (TEAS) for cancer-related fatigue.

## Methods

The study protocol follows the *Cochrane Handbook for Preferred Reporting Items for Systematic Reviews and Meta-Analyses Protocol statement guidelines (PRISMA-P)*<sup>20</sup> and will be started on 1 January 2021.

## Criteria for considering studies for this review

### Types of studies

We will only include randomized controlled trials (RCTs) investigating the efficacy of TEAS on cancer-related fatigue. Cross-over trials and quasi-randomized trials will be excluded.

### Types of participants

We will include patients of any age or sex who have been diagnosed with CRF. Diagnosis follows *The NCCN Clinical Practice Guidelines in Oncology (NCCN Guidelines) for Cancer-Related Fatigue*<sup>21</sup>. If there are no diagnostic criteria documented, it must be diagnosed based on the vital characteristics of CRF (eg, a distressing, persistent and subjective sense of tiredness or exhaustion that could not be alleviated by sleep or rest).

Participants with fatigue caused by other diseases will be excluded such as hepatitis, anemia and hypothyroidism.

### Types of interventions

We will include RCTs that evaluate transcutaneous electrical acupoint stimulation (TEAS), and will exclude other invasive or noninvasive methods of acupoints stimulation such as acupuncture, laser stimulation, moxibustion and acupressure. No limitations of treatment duration will be placed.

Control interventions accepted will be: wait-list control, TEAS on corresponding non-acupoints, Other methods of acupoints stimulation (acupuncture, moxibustion, acupressure), Anti-cancer drugs.

We will also exclude studies that compared TEAS with any other complementary and alternative technologies for which the efficacy has not been validated.

### Types of outcomes

We will include RCTs that took fatigue as the primary outcome of interest and

1  
2  
3 evaluated one of the following primary outcomes for at least 4 weeks of TEAS  
4 treatment. Measurements for CRF contain questionnaires and diaries based on patients`  
5 reports as it is a subjectively experienced symptom.  
6  
7

### 8 **Primary outcomes**

9 Valid scale-scoring tools quantifying and evaluating patient`s self-reported fatigue such  
10 as the revised Piper fatigue scale (FPS)<sup>22</sup> which is wildly used in the assessment of  
11 CRF. It contains 22 items and for subscales with a total score of 10 and each score  
12 section represents the corresponding severity of fatigue: 0 for none, 1-3 for mild, 4-6  
13 for moderate, and 7-10 for severe.  
14  
15

### 16 **Secondary outcomes**

17 The secondary outcomes will, if available, include Quality of life measurement index  
18 (QLI), Capacity of daily activities, Exercise duration, Anxiety, Depression, and adverse  
19 events. The time for evaluation of outcome measures will depend on the specific report  
20 in each included study in that it may be different among studies.  
21  
22  
23

### 24 **Patients and public involvement**

25 We collected patients` suggestions from China for the design of this study and our  
26 findings will be disseminated to Chinese residents through institutions of medical and  
27 health service.  
28  
29  
30

### 31 **Search methods for identification of studies**

#### 32 **Electronic searches**

33 Two review authors (YZ, JX) will search 5 English databases and 2 China databases  
34 including Cochrane Central Register of Controlled Trials (CENTRAL), PubMed,  
35 Embase, ClinicalTrials.gov(www.clinicaltrials.gov), World Health Organization  
36 International Clinical Trial Registry Platform (www.who.it.trialsearch), China National  
37 Knowledge Infrastructure (CNKI) and China Biology Medicine (CBM). The lists of  
38 references of retrieved articles will be searched for potentially eligible trials. Language  
39 restriction will not be set to the electronic searches. When a relevant article is found in  
40 languages other than English and Chinese, it will be arranged to translation. Terms for  
41 search include `fatigue`, `asthenia`, `cancer-related fatigue`, `CRF`, `cancer`,  
42 `carcinoma`, `tumor`, `malignance`, `Transcutaneous electrical acupoints stimulation`,  
43 `TEAS`. The last search update will be done on 31 January 2021.  
44  
45  
46  
47  
48  
49  
50  
51

52 The search strategy for PubMed is shown in [table 1](#).  
53  
54  
55  
56  
57  
58  
59  
60

**Table 1** Search strategy to be used in PubMed

| Number | Search items                                            |
|--------|---------------------------------------------------------|
| 1      | fatigue[MeSH Terms]                                     |
| 2      | fatigue                                                 |
| 3      | cancer-related fatigue                                  |
| 4      | cancer                                                  |
| 5      | carcinoma                                               |
| 6      | malignance                                              |
| 7      | 1 or 2 or 3 or 4 or 5 or 6                              |
| 8      | Transcutaneous electrical acupoint stimulation          |
| 9      | Transcutaneous acupoint electrical stimulation          |
| 10     | TEAS                                                    |
| 11     | transcutaneous electrical acupuncture stimulation       |
| 12     | transcutaneous electrical acupuncture point stimulation |
| 13     | 8 or 9 or 10 or 11 or 12                                |
| 14     | Clinical trials[MeSH Terms]                             |
| 15     | randomized[Title/Abstract]                              |
| 16     | randomly[Title/Abstract]                                |
| 17     | trial[Title]                                            |
| 18     | 14 or 15 or 16 or 17                                    |
| 19     | 7 and 13 and 18                                         |

### Searching other sources

The reference lists of all included articles will be checked by the two review authors to retrieve Additional trials. Handsearching will be applied when abstracts are not available online. Unpublished literatures will be searched via conference proceedings. Information unavailable in the articles will be acquired by contacting the authors when it is possible.

### Data collection and analysis

Data extraction will proceed in accordance with *Cochrane Handbook for Systematic Reviews of Interventions*, version 6.1<sup>23</sup>. Data analyzing will be conducted using RevMan 5.4.1 (Review Manager 2020).

### Selection of studies

Two review authors (YZ, JX) will screen out identified abstracts from the literature search. RCTs evaluating the efficacy of TEAS for patients with cancer-related fatigue will be included. We will retrieve full texts of all remaining articles and the same two



1  
2  
3 review authors will independently screen all the full-text articles according to the  
4 inclusion criteria. Disagreements will be settled by discussion, and when agreement  
5 cannot be reached, the third review author (YR) will make the final decision. The  
6 PRISMA flow diagram of selection process is presented in [figure 1](#).  
7  
8  
9

## 10 **Data extraction and management**

11 We will design a data extraction form by which two authors (YZ, JX) will  
12 independently extract the data from eligible studies. It includes the following  
13 information: author, year of publication, participants, number of participants undergone  
14 randomization, randomization method, allocation concealment method, blinding  
15 method, interventions, analytic set, number of participants analyzed, outcome measures,  
16 adverse events and follow-up. Discrepancies will be resolved through discussion or, if  
17 necessary, by the third author (YR). For unclear information, we will contact the first  
18 or corresponding author to ask for further details.  
19  
20  
21  
22  
23

## 24 **Assessment of risk of bias in included studies**

25 Two reviewer authors will independently assess the risk of bias for each RCTs included  
26 using Cochrane Collaboration's risk of bias tool<sup>24</sup> which contains seven domains:  
27 random sequence generation, allocation concealment, blinding of participants and  
28 personnel, blinding of outcome assessment, incomplete outcome data, selective  
29 reporting and other sources of bias. In each domain the risk of bias will be classified as  
30 'low risk' of bias, 'high risk' of bias or 'unclear risk' of bias. disagreement will be  
31 resolved by discussion or consensus with the third author.  
32  
33  
34  
35  
36

## 37 **Data analysis**

### 38 **Data synthesis**

39 The process will be performed using RevMan 5.4.1 (Review Manager 2020). Trials that  
40 have the same outcome measures in similar populations will be combined to estimate  
41 pooled effect. Risk (RR) will be used as pooled statistics for dichotomous data. For  
42 numeric variables, standardized mean difference (SMD) will be used as pooled  
43 statistics considering that out primary outcome is scoring scale. If the RR or SMD are  
44 not available, we will try to re-calculate them by using the reported data including the  
45 median, p values and confidence intervals (CIs).  
46  
47  
48  
49  
50  
51

52 Hypothesis test will apply inverse variance method for numeric data and the Mantel-  
53 Haenszel method for dichotomous data, and is considered statistically significant when  
54  $p < 0.05$ .  
55  
56

### 57 **Assessment of heterogeneity**

58 Heterogeneity will be assessed using the  $\chi^2$  test and  $I^2$  statistics. When there is no  
59  
60

1  
2  
3 significant heterogeneity ( $I^2 < 50\%$  and  $p > 0.1$ ), the fixed effect model will be applied.  
4 If significant heterogeneity is found ( $80\% > I^2 > 50\%$  and  $p < 0.1$ ), the random effect  
5 model will be applied.  
6  
7

### 8 **Subgroup analysis and sensitivity analysis**

9  
10 Subgroup analysis will be performed based on the primary and secondary outcome  
11 measures to detect possible causes of heterogeneity. The following subgroups will be  
12 investigated respectively: different types of control (wait-list, TEAS on non-acupoints,  
13 acupuncture, drugs), treatment duration, severity of symptoms at baseline.

14  
15 Sensitivity analysis will be performed to confirm the robustness and the stability of the  
16 evidence. We will remove studies of 'high risk' of bias or studies of 'unclear risk' of bias and  
17 reanalyze the remaining data. If sensitivity does not substantially reverse the results, it will  
18 make the results more reliable.  
19  
20  
21  
22

### 23 **Assessment of publication bias**

24  
25 Publication bias will be analyzed using funnel plots if there are more than 10 articles  
26 included. A symmetrically distributed funnel plots indicates that there is no publication  
27 bias. If less than 10 articles are included, Egger and Begg tests will be applied.  
28  
29

### 30 **Summary of evidence**

31  
32 Grading of Recommendations Assessment, Development and Evaluation (GRADE)  
33 will be applied to evaluate the quality of evidence for outcomes. Based on the  
34 methodology of study design, GRADE approach classified the quality of evidence as  
35 'high', 'moderate', 'low', and 'very low'. The quality level can be downgraded by  
36 concerns about risk of bias, indirectness of evidence, heterogeneity, precision of effect  
37 and publication bias in each study.  
38  
39  
40

### 41 **Ethics and dissemination**

42  
43 The results of this systematic review and meta-analysis will be disseminated in a  
44 manner of publication on a peer-reviewed journal. The data that will be used will not  
45 contain private information of participants so that there is no ethical approval required.  
46  
47  
48

49  
50 **Contributors** YZ and JX designed this study. YR is the guarantor for the article. The  
51 manuscript of this protocol was drafted by YZ and revised by YR and JX. The research  
52 strategy was developed by all review authors. YZ and JX will independently carry out  
53 the search, selection and identification of studies and the data extraction. YZ will  
54 perform the data synthesis and analysis. YR will be served as the third author for  
55 settlement of disagreement. YR and ZC will be the adviser for methodology. All authors  
56 have approved the publication of the protocol.  
57  
58  
59

60 **Funding** This study was supported by a major R&D project of the Sichuan Provincial

Department of Science and Technology of China (approval number: 18ZDYF3417).

**Competing interest** None declared.

**Patient consent** Not required.

**Ethics approval** Not required.

## References

1. Berger AM, Abernethy AP, Atkinson A, et al. NCCN Clinical Practice Guidelines Cancer-related fatigue. *J Natl Compr Canc Netw* 2010;8(8):904-31. doi: 10.6004/jnccn.2010.0067 [published Online First: 2010/09/28]
2. Hofman M, Ryan JL, Figueroa-Moseley CD, et al. Cancer-related fatigue: the scale of the problem. *Oncologist* 2007;12 Suppl 1:4-10. doi: 10.1634/theoncologist.12-S1-4 [published Online First: 2007/08/01]
3. Weis J. Cancer-related fatigue: prevalence, assessment and treatment strategies. *Expert Rev Pharmacoecon Outcomes Res* 2011;11(4):441-6. doi: 10.1586/erp.11.44 [published Online First: 2011/08/13]
4. Bower JE. Cancer-related fatigue--mechanisms, risk factors, and treatments. *Nat Rev Clin Oncol* 2014;11(10):597-609. doi: 10.1038/nrclinonc.2014.127 [published Online First: 2014/08/13]
5. Curt GA, Breitbart W, Cella D, et al. Impact of cancer-related fatigue on the lives of patients: new findings from the Fatigue Coalition. *Oncologist* 2000;5(5):353-60. doi: 10.1634/theoncologist.5-5-353 [published Online First: 2000/10/21]
6. Neeffjes EC, van der Vorst MJ, Blauwhoff-Buskermolen S, et al. Aiming for a better understanding and management of cancer-related fatigue. *Oncologist* 2013;18(10):1135-43. doi: 10.1634/theoncologist.2013-0076 [published Online First: 2013/09/17]
7. Gilliam LA, St Clair DK. Chemotherapy-induced weakness and fatigue in skeletal muscle: the role of oxidative stress. *Antioxid Redox Signal* 2011;15(9):2543-63. doi: 10.1089/ars.2011.3965 [published Online First: 2011/04/05]
8. Barsevick A, Frost M, Zwiderman A, et al. I'm so tired: biological and genetic mechanisms of cancer-related fatigue. *Qual Life Res* 2010;19(10):1419-27. doi: 10.1007/s11136-010-9757-7 [published Online First: 2010/10/19]
9. Santoni M, Conti A, Massari F, et al. Treatment-related fatigue with sorafenib, sunitinib and pazopanib in patients with advanced solid tumors: an up-to-date review and meta-analysis of clinical trials. *Int J Cancer* 2015;136(1):1-10. doi: 10.1002/ijc.28715 [published Online First: 2014/01/15]
10. Mitchell SA. Cancer-related fatigue: state of the science. *PM R* 2010;2(5):364-83. doi: 10.1016/j.pmrj.2010.03.024 [published Online First: 2010/07/27]
11. Mustian KM, Alfano CM, Heckler C, et al. Comparison of Pharmaceutical, Psychological, and Exercise Treatments for Cancer-Related Fatigue: A Meta-analysis. *JAMA Oncol* 2017;3(7):961-68. doi: 10.1001/jamaoncol.2016.6914 [published Online First: 2017/03/03]
12. Koornstra RH, Peters M, Donofrio S, et al. Management of fatigue in patients with cancer -- a practical overview. *Cancer Treat Rev* 2014;40(6):791-9. doi: 10.1016/j.ctrv.2014.01.004 [published Online First: 2014/03/01]
13. Xiang Y, Guo Z, Zhu P, et al. Traditional Chinese medicine as a cancer treatment: Modern perspectives of ancient but advanced science. *Cancer Med* 2019;8(5):1958-75. doi: 10.1002/cam4.2108 [published Online First: 2019/04/05]

14. Zhang Y, Lin L, Li H, et al. Effects of acupuncture on cancer-related fatigue: a meta-analysis. *Support Care Cancer* 2018;26(2):415-25. doi: 10.1007/s00520-017-3955-6 [published Online First: 2017/11/13]
15. Tian ZX, Liu CZ, Qi YS, et al. Transcutaneous electrical acupoint stimulation for stage 1 hypertension: protocol for a randomized controlled pilot trial. *Trials* 2020;21(1):558. doi: 10.1186/s13063-020-04493-x [published Online First: 2020/06/24]
16. Hou L, Zhou C, Wu Y, et al. Transcutaneous electrical acupoint stimulation (TEAS) relieved cancer-related fatigue in non-small cell lung cancer (NSCLC) patients after chemotherapy. *J Thorac Dis* 2017;9(7):1959-66. doi: 10.21037/jtd.2017.06.05 [published Online First: 2017/08/26]
17. Tu Q, Yang Z, Gan J, et al. Transcutaneous Electrical Acupoint Stimulation Improves Immunological Function During the Perioperative Period in Patients With Non-Small Cell Lung Cancer Undergoing Video-Assisted Thoracic Surgical Lobectomy. *Technol Cancer Res Treat* 2018;17:1533033818806477. doi: 10.1177/1533033818806477 [published Online First: 2018/11/02]
18. Hou L, Gu F, Gao G, et al. Transcutaneous electrical acupoint stimulation (TEAS) ameliorates chemotherapy-induced bone marrow suppression in lung cancer patients. *J Thorac Dis* 2017;9(3):809-17. doi: 10.21037/jtd.2017.03.12 [published Online First: 2017/04/30]
19. Xing J, Larive B, Mekhail N, et al. Transcutaneous electrical acustimulation can reduce visceral perception in patients with the irritable bowel syndrome: a pilot study. *Altern Ther Health Med* 2004;10(1):38-42. [published Online First: 2004/01/20]
20. Preferred reporting items for systematic review and meta-analysis protocols (PRISMA-P) 2015: elaboration and explanation. *BMJ* 2016;354:i4086. doi: 10.1136/bmj.i4086 [published Online First: 2016/07/23]
21. Berger AM, Mooney K, Alvarez-Perez A, et al. Cancer-Related Fatigue, Version 2.2015. *J Natl Compr Canc Netw* 2015;13(8):1012-39. doi: 10.6004/jnccn.2015.0122 [published Online First: 2015/08/19]
22. Piper BF, Dibble SL, Dodd MJ, et al. The revised Piper Fatigue Scale: psychometric evaluation in women with breast cancer. *Oncol Nurs Forum* 1998;25(4):677-84. [published Online First: 1998/05/26]
23. JPT H, J T, J C, et al. Cochrane Handbook for Systematic Reviews of Interventions version 6.1 (updated September 2020). Cochrane, 2020. Available from [www.training.cochrane.org/handbook](http://www.training.cochrane.org/handbook).
24. Higgins JP, Altman DG, Gotzsche PC, et al. The Cochrane Collaboration's tool for assessing risk of bias in randomised trials. *BMJ* 2011;343:d5928. doi: 10.1136/bmj.d5928 [published Online First: 2011/10/20]

**Figure 1** Flow diagram of the study selection process. CRF, cancer-related fatigue; TEAS, transcutaneous electrical acupoint stimulation.

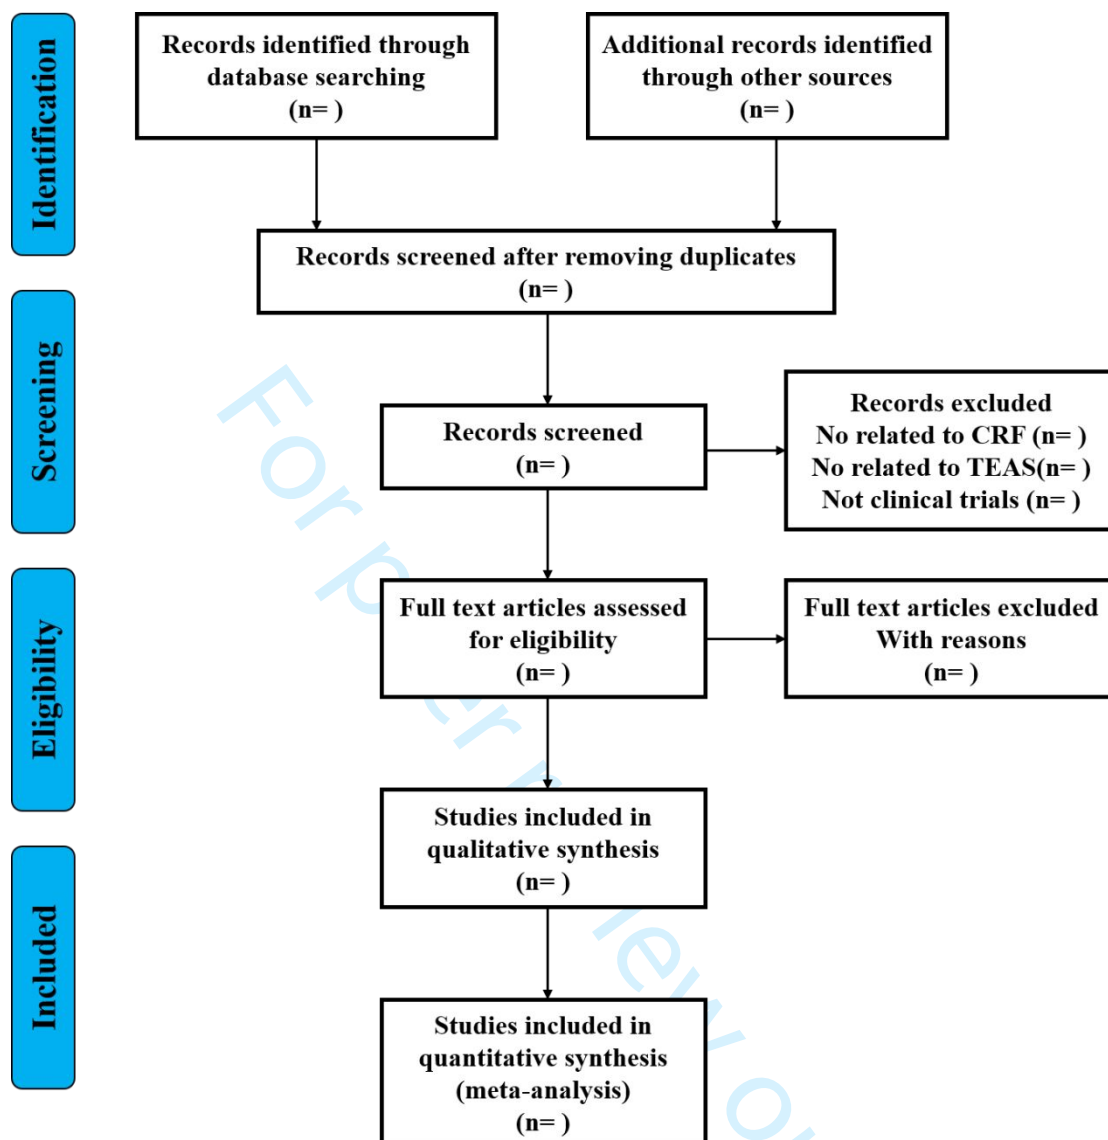

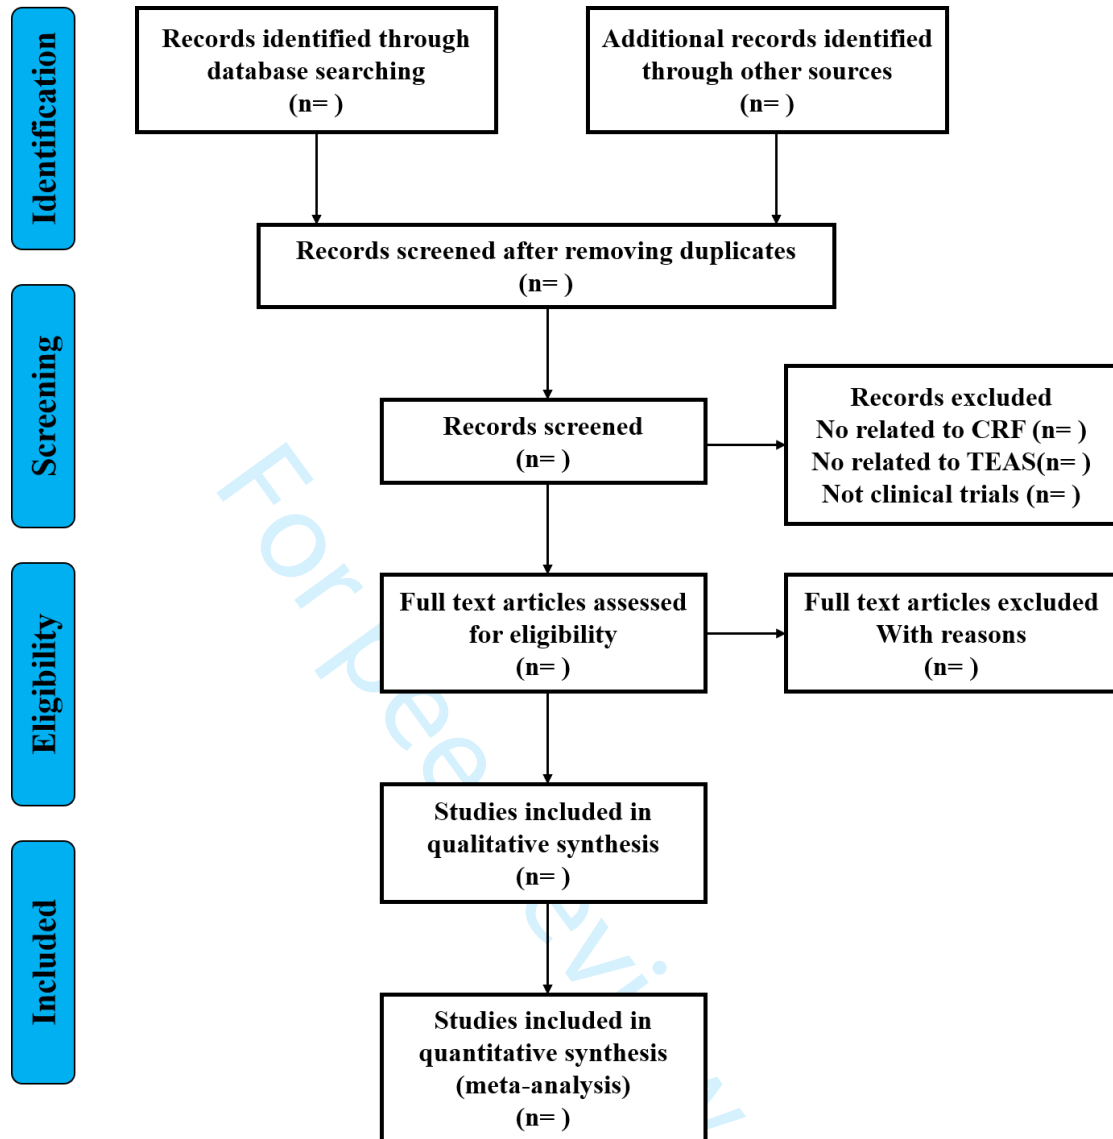

# Reporting checklist for protocol of a systematic review.

Based on the PRISMA-P guidelines.

## Instructions to authors

Complete this checklist by entering the page numbers from your manuscript where readers will find each of the items listed below.

Your article may not currently address all the items on the checklist. Please modify your text to include the missing information. If you are certain that an item does not apply, please write "n/a" and provide a short explanation.

Upload your completed checklist as an extra file when you submit to a journal.

In your methods section, say that you used the PRISMA-Preporting guidelines, and cite them as:

Moher D, Shamseer L, Clarke M, Ghersi D, Liberati A, Petticrew M, Shekelle P, Stewart LA. Preferred Reporting Items for Systematic Review and Meta-Analysis Protocols (PRISMA-P) 2015 statement. *Syst Rev.* 2015;4(1):1.

| Reporting Item      |                     |                                                                                                                                           | Page Number |
|---------------------|---------------------|-------------------------------------------------------------------------------------------------------------------------------------------|-------------|
| <b>Title</b>        |                     |                                                                                                                                           |             |
| Identification      | <a href="#">#1a</a> | Identify the report as a protocol of a systematic review                                                                                  | 1           |
| Update              | <a href="#">#1b</a> | If the protocol is for an update of a previous systematic review, identify as such                                                        | n/a         |
| <b>Registration</b> |                     |                                                                                                                                           |             |
|                     | <a href="#">#2</a>  | If registered, provide the name of the registry (such as PROSPERO) and registration number                                                | 1           |
| <b>Authors</b>      |                     |                                                                                                                                           |             |
| Contact             | <a href="#">#3a</a> | Provide name, institutional affiliation, e-mail address of all protocol authors; provide physical mailing address of corresponding author | 1           |
| Contribution        | <a href="#">#3b</a> | Describe contributions of protocol authors and identify the guarantor of the review                                                       | 7           |
| <b>Amendments</b>   |                     |                                                                                                                                           |             |

|    |                      |                      |                                                                           |     |
|----|----------------------|----------------------|---------------------------------------------------------------------------|-----|
| 1  |                      | <a href="#">#4</a>   | If the protocol represents an amendment of a previously completed or      | n/a |
| 2  |                      |                      | published protocol, identify as such and list changes; otherwise, state   |     |
| 3  |                      |                      | plan for documenting important protocol amendments                        |     |
| 4  |                      |                      |                                                                           |     |
| 5  |                      |                      |                                                                           |     |
| 6  | <b>Support</b>       |                      |                                                                           |     |
| 7  |                      |                      |                                                                           |     |
| 8  | Sources              | <a href="#">#5a</a>  | Indicate sources of financial or other support for the review             | 7   |
| 9  |                      |                      |                                                                           |     |
| 10 | Sponsor              | <a href="#">#5b</a>  | Provide name for the review funder and / or sponsor                       | n/a |
| 11 |                      |                      |                                                                           |     |
| 12 | Role of sponsor or   | <a href="#">#5c</a>  | Describe roles of funder(s), sponsor(s), and / or institution(s), if any, | 7   |
| 13 | funder               |                      | in developing the protocol                                                |     |
| 14 |                      |                      |                                                                           |     |
| 15 |                      |                      |                                                                           |     |
| 16 |                      |                      |                                                                           |     |
| 17 | <b>Introduction</b>  |                      |                                                                           |     |
| 18 |                      |                      |                                                                           |     |
| 19 | Rationale            | <a href="#">#6</a>   | Describe the rationale for the review in the context of what is already   | 2-3 |
| 20 |                      |                      | known                                                                     |     |
| 21 |                      |                      |                                                                           |     |
| 22 | Objectives           | <a href="#">#7</a>   | Provide an explicit statement of the question(s) the review will          | 3   |
| 23 |                      |                      | address with reference to participants, interventions, comparators, and   |     |
| 24 |                      |                      | outcomes (PICO)                                                           |     |
| 25 |                      |                      |                                                                           |     |
| 26 |                      |                      |                                                                           |     |
| 27 |                      |                      |                                                                           |     |
| 28 | <b>Methods</b>       |                      |                                                                           |     |
| 29 |                      |                      |                                                                           |     |
| 30 | Eligibility criteria | <a href="#">#8</a>   | Specify the study characteristics (such as PICO, study design, setting,   | 3   |
| 31 |                      |                      | time frame) and report characteristics (such as years considered,         |     |
| 32 |                      |                      | language, publication status) to be used as criteria for eligibility for  |     |
| 33 |                      |                      | the review                                                                |     |
| 34 |                      |                      |                                                                           |     |
| 35 | Information sources  | <a href="#">#9</a>   | Describe all intended information sources (such as electronic             | 4   |
| 36 |                      |                      | databases, contact with study authors, trial registers or other grey      |     |
| 37 |                      |                      | literature sources) with planned dates of coverage                        |     |
| 38 |                      |                      |                                                                           |     |
| 39 | Search strategy      | <a href="#">#10</a>  | Present draft of search strategy to be used for at least one electronic   | 10  |
| 40 |                      |                      | database, including planned limits, such that it could be repeated        |     |
| 41 |                      |                      |                                                                           |     |
| 42 | Study records - data | <a href="#">#11a</a> | Describe the mechanism(s) that will be used to manage records and         | 5   |
| 43 | management           |                      | data throughout the review                                                |     |
| 44 |                      |                      |                                                                           |     |
| 45 | Study records -      | <a href="#">#11b</a> | State the process that will be used for selecting studies (such as two    | 5   |
| 46 | selection process    |                      | independent reviewers) through each phase of the review (that is,         |     |
| 47 |                      |                      | screening, eligibility and inclusion in meta-analysis)                    |     |
| 48 |                      |                      |                                                                           |     |
| 49 | Study records - data | <a href="#">#11c</a> | Describe planned method of extracting data from reports (such as          | 5   |
| 50 | collection process   |                      | piloting forms, done independently, in duplicate), any processes for      |     |
| 51 |                      |                      |                                                                           |     |
| 52 |                      |                      |                                                                           |     |
| 53 |                      |                      |                                                                           |     |
| 54 |                      |                      |                                                                           |     |
| 55 |                      |                      |                                                                           |     |
| 56 |                      |                      |                                                                           |     |
| 57 |                      |                      |                                                                           |     |
| 58 |                      |                      |                                                                           |     |
| 59 |                      |                      |                                                                           |     |
| 60 |                      |                      |                                                                           |     |



|    |                    |                                                                                           |     |
|----|--------------------|-------------------------------------------------------------------------------------------|-----|
|    |                    | obtaining and confirming data from investigators                                          |     |
| 1  |                    |                                                                                           |     |
| 2  |                    |                                                                                           |     |
| 3  | Data items         | <a href="#">#12</a> List and define all variables for which data will be sought (such as  | 5   |
| 4  |                    | PICO items, funding sources), any pre-planned data assumptions and                        |     |
| 5  |                    | simplifications                                                                           |     |
| 6  |                    |                                                                                           |     |
| 7  |                    |                                                                                           |     |
| 8  | Outcomes and       | <a href="#">#13</a> List and define all outcomes for which data will be sought, including | 4   |
| 9  | prioritization     | prioritization of main and additional outcomes, with rationale                            |     |
| 10 |                    |                                                                                           |     |
| 11 |                    |                                                                                           |     |
| 12 | Risk of bias in    | <a href="#">#14</a> Describe anticipated methods for assessing risk of bias of individual | 5   |
| 13 | individual studies | studies, including whether this will be done at the outcome or study                      |     |
| 14 |                    | level, or both; state how this information will be used in data synthesis                 |     |
| 15 |                    |                                                                                           |     |
| 16 |                    |                                                                                           |     |
| 17 | Data synthesis     | <a href="#">#15a</a> Describe criteria under which study data will be quantitatively      | 5-6 |
| 18 |                    | synthesised                                                                               |     |
| 19 |                    |                                                                                           |     |
| 20 |                    |                                                                                           |     |
| 21 | Data synthesis     | <a href="#">#15b</a> If data are appropriate for quantitative synthesis, describe planned | 6   |
| 22 |                    | summary measures, methods of handling data and methods of                                 |     |
| 23 |                    | combining data from studies, including any planned exploration of                         |     |
| 24 |                    | consistency (such as I <sup>2</sup> , Kendall's $\tau$ )                                  |     |
| 25 |                    |                                                                                           |     |
| 26 |                    |                                                                                           |     |
| 27 |                    |                                                                                           |     |
| 28 | Data synthesis     | <a href="#">#15c</a> Describe any proposed additional analyses (such as sensitivity or    | 6   |
| 29 |                    | subgroup analyses, meta-regression)                                                       |     |
| 30 |                    |                                                                                           |     |
| 31 | Data synthesis     | <a href="#">#15d</a> If quantitative synthesis is not appropriate, describe the type of   | 6   |
| 32 |                    | summary planned                                                                           |     |
| 33 |                    |                                                                                           |     |
| 34 |                    |                                                                                           |     |
| 35 | Meta-bias(es)      | <a href="#">#16</a> Specify any planned assessment of meta-bias(es) (such as publication  | 6   |
| 36 |                    | bias across studies, selective reporting within studies)                                  |     |
| 37 |                    |                                                                                           |     |
| 38 |                    |                                                                                           |     |
| 39 | Confidence in      | <a href="#">#17</a> Describe how the strength of the body of evidence will be assessed    | 6   |
| 40 | cumulative         | (such as GRADE)                                                                           |     |
| 41 | evidence           |                                                                                           |     |
| 42 |                    |                                                                                           |     |
| 43 |                    |                                                                                           |     |

The PRISMA-P checklist is distributed under the terms of the Creative Commons Attribution License CC-BY 4.0. This checklist was completed on 21. January 2021 using <https://www.goodreports.org/>, a tool made by the [EQUATOR Network](#) in collaboration with [Penelope.ai](#)

# BMJ Open

## Transcutaneous electrical acupoint stimulation (TEAS) for cancer-related fatigue: study protocol for a systematic review and meta-analysis

|                                  |                                                                                                                                                                                                                                                                                                                                                                                                            |
|----------------------------------|------------------------------------------------------------------------------------------------------------------------------------------------------------------------------------------------------------------------------------------------------------------------------------------------------------------------------------------------------------------------------------------------------------|
| Journal:                         | <i>BMJ Open</i>                                                                                                                                                                                                                                                                                                                                                                                            |
| Manuscript ID                    | bmjopen-2021-049318.R1                                                                                                                                                                                                                                                                                                                                                                                     |
| Article Type:                    | Protocol                                                                                                                                                                                                                                                                                                                                                                                                   |
| Date Submitted by the Author:    | 11-Jul-2021                                                                                                                                                                                                                                                                                                                                                                                                |
| Complete List of Authors:        | Zeng, YiWei; Chengdu University of TCM, School of Acupuncture and Tuina<br>Xia, Jialin; Chengdu University of TCM, School of Nursing<br>Chen, Zhihan; Chengdu University of Traditional Chinese Medicine, Acupuncture and Tuina school<br>Tian, Xiaoping; Chengdu University of Traditional Chinese Medicine<br>Ren, Yulan; Chengdu University of Traditional Chinese Medicine, School of Chinese Classics |
| <b>Primary Subject Heading</b> : | Complementary medicine                                                                                                                                                                                                                                                                                                                                                                                     |
| Secondary Subject Heading:       | Oncology                                                                                                                                                                                                                                                                                                                                                                                                   |
| Keywords:                        | COMPLEMENTARY MEDICINE, ONCOLOGY, PUBLIC HEALTH                                                                                                                                                                                                                                                                                                                                                            |
|                                  |                                                                                                                                                                                                                                                                                                                                                                                                            |

SCHOLARONE™  
Manuscripts



I, the Submitting Author has the right to grant and does grant on behalf of all authors of the Work (as defined in the below author licence), an exclusive licence and/or a non-exclusive licence for contributions from authors who are: i) UK Crown employees; ii) where BMJ has agreed a CC-BY licence shall apply, and/or iii) in accordance with the terms applicable for US Federal Government officers or employees acting as part of their official duties; on a worldwide, perpetual, irrevocable, royalty-free basis to BMJ Publishing Group Ltd ("BMJ") its licensees and where the relevant Journal is co-owned by BMJ to the co-owners of the Journal, to publish the Work in this journal and any other BMJ products and to exploit all rights, as set out in our [licence](#).

The Submitting Author accepts and understands that any supply made under these terms is made by BMJ to the Submitting Author unless you are acting as an employee on behalf of your employer or a postgraduate student of an affiliated institution which is paying any applicable article publishing charge ("APC") for Open Access articles. Where the Submitting Author wishes to make the Work available on an Open Access basis (and intends to pay the relevant APC), the terms of reuse of such Open Access shall be governed by a Creative Commons licence – details of these licences and which [Creative Commons](#) licence will apply to this Work are set out in our licence referred to above.

Other than as permitted in any relevant BMJ Author's Self Archiving Policies, I confirm this Work has not been accepted for publication elsewhere, is not being considered for publication elsewhere and does not duplicate material already published. I confirm all authors consent to publication of this Work and authorise the granting of this licence.

1 **Transcutaneous electrical acupoint stimulation (TEAS) for**  
2 **cancer-related fatigue: study protocol for a systematic**  
3 **review and meta-analysis**

4 Yiwei Zeng<sup>1</sup>, Jialin Xia<sup>2</sup>, Zhihan Chen<sup>1</sup>, Xiaoping Tian<sup>3\*</sup>, Yulan Ren<sup>3\*</sup>

5 <sup>1</sup> School of Acupuncture and Tuina, Chengdu University of Traditional Chinese  
6 Medicine, Chengdu, China

7 <sup>2</sup> School of Nursing, Chengdu University of Traditional Chinese Medicine, Chengdu,  
8 China

9 <sup>3</sup> School of Chinese Classics, Chengdu University of Traditional Chinese Medicine,  
10 Chengdu, China

11  
12 **Correspondence to**

13 Dr. Xiaoping Tian, School of Acupuncture and Tuina, Chengdu University of  
14 Traditional Chinese Medicine, Chengdu, China; tianxiaoping@cducm.edu.cn

15 Prof. Yulan Ren, School of Chinese Classics, Chengdu University of Traditional  
16 Chinese Medicine, Chengdu 610075, China; renxg2468@163.com

17  
18 **Abstract**

19 **Introduction** Cancer-related fatigue (CRF) is a prevalent symptom in cancer survivors.  
20 Transcutaneous electrical acupoint stimulation (TEAS) has been reported as a  
21 promising therapy for CRF. This protocol is proposed for a systematic review that aims  
22 to assess the efficacy and safety of TEAS for CRF.

23  
24 **Methods and analysis** CENTRAL, PubMed, Medline, EMBASE, Chinese National  
25 Knowledge Infrastructure, VIP, Wanfang database, Chinese Biomedical Literature  
26 Database, Chinese Clinical Trial Registry System ClinicalTrials.gov, and World Health  
27 Organization International Clinical Trial Registry Platform will be searched from  
28 inception to 31 January 2021 without language limitations. The eligible randomized  
29 controlled trials (RCTs) will be included. The primary outcomes include changes in the  
30 revised Piper fatigue scale, the Brief fatigue inventory, the Multidimensional fatigue  
31 inventory, and the Functional assessment of chronic illness therapy-fatigue. The  
32 secondary outcomes are the quality-of-life measurement index, the Hamilton anxiety

1  
2  
3  
4 33 scale, the Hamilton depression scale, and adverse events. The selection of studies, data  
5 34 extraction, and assessment of risk of bias will be conducted independently by two  
6 35 reviewers. Data synthesis will be performed using RevMan 5.4.1. The quality of  
7 36 evidence will be evaluated with the Grading of Recommendations, Assessment,  
8 37 Development and Evaluation system. This study will strictly adhere to the Preferred  
9 38 Reporting Items for Systematic Review and Meta-Analysis Protocols guidelines.  
10  
11  
12  
13

39

14 40 **Ethics and dissemination** Ethical approval is not required as this is a systematic review  
15 41 and meta-analysis based on previously published studies involving no private  
16 42 information of patients. The results of this study will be disseminated in a peer-reviewed  
17 43 journal.  
18  
19

20  
21 44 **PROSPERO registration number** CRD42020220282  
22  
23

45

24 46 **Keywords** Cancer-related fatigue; transcutaneous electrical acupoint stimulation;  
25 47 meta-analysis; protocol  
26  
27

48

## 49 **Strength and limitations of this study**

- 30  
31  
32 50 ● To the best of our knowledge, this study will be the first systematic review and  
33 51 meta-analysis to evaluate the efficacy and safety of TEAS for CRF.  
34  
35 52 ● The study will review quantitative data systematically from multiple databases to  
36 53 assess the efficacy and safety of TEAS for patients with CRF.  
37  
38  
39 54 ● This study follows the Preferred Reporting Items for Systematic Review and Meta-  
40 55 Analysis Protocols guidelines.  
41  
42  
43 56 ● Potential poor methodological quality, publication bias, and small sample size of  
44 57 the included studies may be the limitations of the study.  
45  
46  
47  
48

## 49 **Introduction**

50  
51 59 Cancer-related fatigue (CRF), a common symptom in cancer survivors, is defined as a  
52 60 distressing, persistent, and subjective sense of tiredness or exhaustion that cannot be  
53 61 alleviated by sleep or rest.<sup>1</sup> It is almost universal in those patients receiving anti-cancer  
54 62 treatments and affects nearly 65% of cancer survivors.<sup>2-4</sup> Approximately 62% to 85%  
55 63 of cancer patients who undergo active treatments experience CRF.<sup>5</sup> CRF is not just an  
56 64 isolated symptom, but associates with anxiety, depression, and insomnia.<sup>6</sup> It is a  
57  
58  
59  
60

1  
2  
3  
4 65 multifactorial condition involving anemia, inflammation-mediated changes of  
5 66 cytokines, cellular immunity dysregulation, and oxidative-stress-induced striated  
6 67 muscle dysfunction mediated by cancer or chemotherapeutic agents.<sup>7-9</sup> It inflicts a  
7  
8 68 negative impact on patients' quality of daily life and may cause treatment  
9  
10 69 discontinuation and survival reduction.<sup>8 10</sup> However, it has often been underestimated,  
11 70 underdiagnosed, and insufficiently treated.<sup>11</sup> Though both pharmacological and non-  
12 71 pharmacological interventions have been applied in clinical management, a meta-  
13 72 analysis has shown that compared with non-pharmaceutical therapy, the efficacy of  
14 73 drugs on CRF is inferior with an increased risk of side effects.<sup>12 13</sup> The gold standard  
15 74 for CRF management is still unavailable.<sup>14</sup> Hence, an effective and safe treatment  
16 75 option remains an urgent need for patients with CRF.

17  
18  
19  
20 76 Traditional Chinese medicine (TCM) has been widely used among cancer  
21 77 survivors in China and gradually accepted worldwide by its efficacy in recent years.<sup>15</sup>  
22 78 As an integral part of TCM, acupuncture is being adopted by cancer patients for a wide  
23 79 range of cancer-related symptoms, and some clinical trials have shown that acupuncture  
24 80 can provide clinical benefits for patients with CRF.<sup>16 17</sup> Transcutaneous electrical  
25 81 acupoint stimulation (TEAS) combines transcutaneous electrical nerve stimulation with  
26 82 acupoint stimulation and is a non-invasive alternative to acupuncture. Under the  
27 83 guidance of meridian theory, this technique stimulates acupoints on the surface with  
28 84 low-voltage pulses close to the body's bioelectricity and has been reported to relieve  
29 85 the varieties of cancer-related symptoms, including fatigue, immunosuppression, and  
30 86 bone marrow suppression.<sup>18-21</sup> In addition, compared with the traditional manual  
31 87 acupuncture that requires qualified acupuncturists or TCM clinicians to perform, TEAS  
32 88 can be implemented by nursing staff or patients themselves after training making it  
33 89 more accessible.<sup>22</sup> Moreover, this non-invasive therapeutic approach is pain-free and  
34 90 more acceptable for patients with needle phobia.<sup>23</sup>

35  
36  
37  
38  
39  
40  
41  
42  
43  
44 91 In recent years, an increasing body of clinical trials has been carried out to evaluate  
45 92 the efficacy and safety of TEAS on CRF patients, and the results have indicated it might  
46 93 be a promising therapeutic intervention. However, currently no systematic review has  
47 94 been reported to assess the clinical evidence. This study will include and systematically  
48 95 synthesize the eligible randomized clinical trials (RCTs) without language restrictions.  
49 96 To the best of our knowledge, this meta-analysis is the first attempt to assess the  
50 97 available evidence of TEAS for the treatment of CRF. Hopefully, this study may yield  
51 98 helpful information for the people concerned.  
52  
53  
54  
55  
56  
57  
58  
59  
60

## 100 **Objective**

101 This systematic review aims to critically assess the efficacy and safety of TEAS for  
102 CRF.

## 103 **Methods**

104 The study protocol will follow the *Cochrane Handbook for Preferred Reporting Items*  
105 *for Systematic Reviews and Meta-Analyses Protocol statement guidelines (PRISMA-*  
106 *P)*.<sup>24 25</sup>

## 108 **Criteria for including studies for this review**

### 109 **Types of studies**

110 We will only include randomized controlled trials (RCTs) investigating the efficacy  
111 and safety of TEAS on CRF. Cross-over trials and quasi-randomized trials will be  
112 excluded.

### 113 **Types of participants**

114 We will include patients with CRF of any age or sex who have been diagnosed by any  
115 recognized diagnostic criteria (e.g., the NCCN Clinical Practice Guidelines in  
116 Oncology (NCCN Guidelines) for Cancer-Related Fatigue) or based on the vital  
117 characteristics of CRF (e.g., a distressing, persistent, and subjective sense of tiredness  
118 or exhaustion that could not be alleviated by sleep or rest). Participants with fatigue  
119 caused by other diseases will be excluded, such as hepatitis, anemia, and  
120 hypothyroidism.

### 121 **Types of interventions**

122 We will include RCTs that utilize TEAS with or without conventional medicine and  
123 exclude other invasive or noninvasive acupoint stimulation methods, such as  
124 acupuncture, laser stimulation, moxibustion, and acupressure. No limitations will be  
125 placed on the duration of treatment.

### 126 **Types of comparator(s)/control**

127 Control interventions will be wait-list control, TEAS on corresponding non-acupoints,  
128 other methods of acupoint stimulation (e.g., acupuncture, moxibustion, and  
129 acupressure), and the same conventional anti-cancer drugs as the interventional group.  
130 We will also exclude studies that compare TEAS with any other complementary and  
131 alternative therapies.

### 132 **Types of outcome measures**

#### 133 **Primary outcomes**

134 The primary outcomes include changes in the revised Piper fatigue scale (PFS-R).<sup>26</sup> It

135 is a well-recognized and commonly used multidimensional measure in the CRF  
 136 research field and contains 22 items and four subscales with a total score of 10, and  
 137 each score section represents the corresponding severity of fatigue (0 for none, 1-3 for  
 138 mild, 4-6 for moderate, and 7-10 for severe fatigue). CRF scores measured with other  
 139 tools will also be included such as the Brief fatigue inventory (BFI), the  
 140 Multidimensional fatigue inventory (MFI), and the Functional assessment of chronic  
 141 illness therapy-fatigue (FACIT-F).

#### 142 **Secondary outcomes**

143 The secondary outcomes will include the quality-of-life measurement index (QLI), the  
 144 anxiety and depression levels measured by qualified scales such as the Hamilton anxiety  
 145 scale (HAMA) and the Hamilton depression scale (HAMD), and adverse events.

#### 146 **Patients and public involvement**

147 No patient involved.

#### 148 **Search methods for identification of studies**

##### 149 **Electronic searches**

150 Two reviewers (YWZ, JLX) will independently search Cochrane Central Register of  
 151 Controlled Trials (CENTRAL), PubMed, EMBASE, China National Knowledge  
 152 Infrastructure (CNKI), VIP, Wanfang database, Chinese Biomedical Literature  
 153 Database (CBM), ClinicalTrials.gov(www.clinicaltrials.gov), and World Health  
 154 Organization International Clinical Trial Registry Platform (www.who.it.trialsearch)  
 155 from inception to 31 January 2021. The lists of references of retrieved articles will be  
 156 searched for identifying potentially eligible trials. Language restriction will not be  
 157 imposed on the electronic searches. We will use the following terms in a combination  
 158 for the search: fatigue, asthenia, cancer-related fatigue, CRF, cancer, carcinoma, tumor,  
 159 malignancy, Transcutaneous electrical acupoints stimulation, and TEAS. The search  
 160 strategy for PubMed is shown in [table 1.](#)

##### 161 **Searching other sources**

162 The two reviewers will check the reference lists of all included articles to retrieve  
 163 additional trials. Manual searching will be applied when abstracts are not available  
 164 online. Unpublished literature will be searched via conference proceedings. Information  
 165 unavailable in the articles will be acquired by contacting the authors when it is possible.

166  
 167

**Table 1** Search strategy to be used in PubMed

| Search Line | Search items         |
|-------------|----------------------|
| #1          | fatigue [MeSH Terms] |



|    |     |
|----|-----|
| 1  |     |
| 2  |     |
| 3  |     |
| 4  | #2  |
| 5  | #3  |
| 6  | #4  |
| 7  | #5  |
| 8  | #6  |
| 9  | #7  |
| 10 | #8  |
| 11 | #9  |
| 12 | #10 |
| 13 | #11 |
| 14 | #12 |
| 15 | #13 |
| 16 | #14 |
| 17 | #15 |
| 18 | #16 |
| 19 | #17 |
| 20 | #18 |
| 21 | #19 |
| 22 | #20 |
| 23 |     |
| 24 |     |
| 25 |     |
| 26 |     |
| 27 |     |
| 28 |     |
| 29 |     |
| 30 |     |
| 31 |     |
| 32 |     |
| 33 |     |
| 34 |     |
| 35 |     |
| 36 |     |
| 37 |     |
| 38 |     |
| 39 |     |
| 40 |     |
| 41 |     |
| 42 |     |
| 43 |     |
| 44 |     |
| 45 |     |
| 46 |     |
| 47 |     |
| 48 |     |
| 49 |     |
| 50 |     |
| 51 |     |
| 52 |     |
| 53 |     |
| 54 |     |
| 55 |     |
| 56 |     |
| 57 |     |
| 58 |     |
| 59 |     |
| 60 |     |

168

## 169 **Data collection and analysis**

170 Data extraction will be performed in accordance with the *Cochrane Handbook for*  
 171 *Systematic Reviews of Interventions*, version 6.1.<sup>27</sup> Data analysis will be conducted  
 172 using RevMan 5.4.1 (Review Manager 2020).

## 173 **Selection of studies**

174 Two reviewers (YWZ, JLX) will independently perform abstract screening. RCTs  
 175 evaluating the efficacy of TEAS for patients with CRF will be included. We will  
 176 retrieve the full texts of all remaining articles and independently screen all the full-text  
 177 articles according to the inclusion criteria. Disagreements will be settled by discussion,  
 178 and when an agreement cannot be reached, the third review author (YLR) will make  
 179 the final decision. The PRISMA flow diagram of the selection process is presented in  
 180 [figure 1](#).

## 181 **Data extraction and management**

182 We will design a data extraction form and two authors (YWZ, JLX) will independently  
 183 extract the data from the eligible studies. It includes the following information:  
 184 reference ID, author, year of publication, participant characteristics (e.g., age, gender,  
 185 duration and severity of the disease), sample size, randomization method, allocation

186 concealment method, blinding method, interventions, analytic set, number of  
187 participants analyzed, outcome measures, adverse events, and follow-up. Discrepancies  
188 will be resolved through discussion or by the third reviewer (YLR). For unclear  
189 information, we will contact the first or corresponding author.

### 190 **Assessment of risk of bias in included studies**

191 Two reviewers will independently assess the risk of bias for each RCTs included using  
192 Cochrane Collaboration's risk of bias tool, which contains seven domains: random  
193 sequence generation, allocation concealment, blinding of participants and personnel,  
194 blinding of outcome assessment, incomplete outcome data, selective reporting, and  
195 other sources of bias. In each domain, the risk of bias will be classified as 'low risk' of  
196 bias, 'high risk' of bias, or 'unclear risk' of bias.<sup>28</sup> Disagreement will be resolved by  
197 discussion or consensus with the third author.

### 198 **Data analysis**

#### 199 **Data synthesis**

200 The process will be performed using RevMan 5.4.1 (Review Manager 2020). Trials that  
201 have the same outcome measures in similar populations will be combined to estimate  
202 the pooled effect. For dichotomous data, a risk ratio (RR) with 95% confidence intervals  
203 (CIs) will be used as pooled statistics. For numeric variables, standardized mean  
204 difference (SMD) with 95% CIs will be used considering that the primary outcome is  
205 the scoring scale. If the RR or SMD is not available, we will try to re-calculate them  
206 using the reported data, including the median, p values, and confidence intervals (CIs).  
207 The hypothesis test will apply the inverse variance method for numeric data and the  
208 Mantel-Haenszel method for dichotomous data. A *p*-value less than 0.05 ( $p < 0.05$ ) is  
209 statistically significant. If the meta-analysis is unfeasible, we will provide a narrative  
210 description of the results.

#### 211 **Assessment of heterogeneity**

212 Heterogeneity will be assessed using the  $\chi^2$  test and  $I^2$  statistics. When there is no  
213 significant heterogeneity ( $I^2 < 50\%$  and  $p > 0.1$ ), the fixed-effect model will be applied.  
214 The random-effects model will be applied for significant heterogeneity ( $80\% > I^2 > 50\%$   
215 and  $p < 0.1$ ).

#### 216 **Subgroup analysis and sensitivity analysis**

217 Subgroup analysis will be performed based on the primary and secondary outcome  
218 measures to detect possible causes of heterogeneity. The following subgroups will be  
219 investigated respectively: different types of the control (e.g., wait-list, TEAS on non-  
220 acupoints, acupuncture, and drugs), treatment duration, and the severity of symptoms  
221 at baseline. A sensitivity analysis will be performed to evaluate the robustness and

222 stability of the evidence, analyses will be limited to studies with a low risk of bias, and  
223 one study will be iteratively removed at a time.

## 224 **Assessment of publication bias**

225 Publication bias will be analyzed using funnel plots if there are more than ten studies  
226 included. A symmetrically distributed funnel plot indicates that there is no publication  
227 bias. If less than ten articles are included, Egger and Begg tests will be applied.

## 228 **Summary of evidence**

229 Grading of Recommendations Assessment, Development and Evaluation (GRADE)  
230 will be applied to classify the quality of evidence as 'high', 'moderate', 'low', and 'very  
231 low' in the domain of the risk of bias (methodological quality), indirectness of evidence,  
232 heterogeneity, precision of effect, and publication bias in each study.

## 233 **Ethics and dissemination**

234 The results of this systematic review and meta-analysis will be disseminated in a peer-  
235 reviewed journal. No ethical approval is required since this study will not contain any  
236 private information of participants.

237  
238 **Contributors** YWZ, JLX, XPT, and YLR designed this study. XPT and YLR are the  
239 guarantors for the study. The manuscript of this protocol was drafted by YWZ and  
240 revised by YLR and XPT. All reviewers developed the research strategy. YWZ and  
241 JLX will independently carry out the search, selection and identification of studies and  
242 the data extraction. YWZ and XPT will perform the data synthesis and analysis. YLR  
243 will be served as the third reviewer for settlement of disagreement. YLR and ZHC will  
244 be the adviser for methodology. All authors have approved the publication of this  
245 protocol.

246 **Funding** This study was supported by a major R&D project of the Sichuan Provincial  
247 Department of Science and Technology of China (approval number: 2018SZ071).

248 **Competing interest** None declared.

249 **Patient consent** Not required.

250 **Ethics approval** Not required.

251

## 252 **References**

253 [dataset] 1. Berger AM, Abernethy AP, Atkinson A, et al. NCCN Clinical Practice Guidelines Cancer-  
254 related fatigue. *J Natl Compr Canc Netw* 2010;8(8):904-31. doi: 10.6004/jnccn.2010.0067  
255 [published Online First: 2010/09/28]

- 1  
2  
3 256 [dataset] 2. Hofman M, Ryan JL, Figueroa-Moseley CD, et al. Cancer-related fatigue: the scale of the  
4 257 problem. *Oncologist* 2007;12 Suppl 1:4-10. doi: 10.1634/theoncologist.12-S1-4
- 5  
6 258 [dataset] 3. Weis J. Cancer-related fatigue: prevalence, assessment and treatment strategies. *Expert Rev*  
7 259 *Pharmacoecon Outcomes Res* 2011;11(4):441-6. doi: 10.1586/erp.11.44
- 8  
9 260 [dataset] 4. Fabi A, Bhargava R, Fatigoni S, et al. Cancer-related fatigue: ESMO Clinical Practice  
10 261 Guidelines for diagnosis and treatment. *Ann Oncol* 2020;31(6):713-23. doi:  
11 262 10.1016/j.annonc.2020.02.016
- 12  
13 263 [dataset] 5. Thong MSY, van Noorden CJF, Steindorf K, et al. Cancer-Related Fatigue: Causes and  
14 264 Current Treatment Options. *Curr Treat Options Oncol* 2020;21(2):17. doi: 10.1007/s11864-020-  
15 265 0707-5
- 16  
17 266 [dataset] 6. Neefjes EC, van der Vorst MJ, Blauwhoff-Buskermolen S, et al. Aiming for a better  
18 267 understanding and management of cancer-related fatigue. *Oncologist* 2013;18(10):1135-43. doi:  
19 268 10.1634/theoncologist.2013-0076
- 20  
21 269 [dataset] 7. Gilliam LA, St Clair DK. Chemotherapy-induced weakness and fatigue in skeletal muscle:  
22 270 the role of oxidative stress. *Antioxid Redox Signal* 2011;15(9):2543-63. doi:  
23 271 10.1089/ars.2011.3965
- 24  
25 272 [dataset] 8. Bower JE. Cancer-related fatigue--mechanisms, risk factors, and treatments. *Nat Rev Clin*  
26 273 *Oncol* 2014;11(10):597-609. doi: 10.1038/nrclinonc.2014.127
- 27  
28 274 [dataset] 9. Barsevick A, Frost M, Zwinderman A, et al. I'm so tired: biological and genetic mechanisms  
29 275 of cancer-related fatigue. *Qual Life Res* 2010;19(10):1419-27. doi: 10.1007/s11136-010-9757-7
- 30  
31 276 [dataset] 10. Curt GA, Breitbart W, Cella D, et al. Impact of cancer-related fatigue on the lives of patients:  
32 277 new findings from the Fatigue Coalition. *Oncologist* 2000;5(5):353-60. doi:  
33 278 10.1634/theoncologist.5-5-353
- 34  
35 279 [dataset] 11. Santoni M, Conti A, Massari F, et al. Treatment-related fatigue with sorafenib, sunitinib and  
36 280 pazopanib in patients with advanced solid tumors: an up-to-date review and meta-analysis of  
37 281 clinical trials. *Int J Cancer* 2015;136(1):1-10. doi: 10.1002/ijc.28715
- 38  
39 282 [dataset] 12. Mitchell SA. Cancer-related fatigue: state of the science. *PM R* 2010;2(5):364-83. doi:  
40 283 10.1016/j.pmrj.2010.03.024
- 41  
42 284 [dataset] 13. Mustian KM, Alfano CM, Heckler C, et al. Comparison of Pharmaceutical, Psychological,  
43 285 and Exercise Treatments for Cancer-Related Fatigue: A Meta-analysis. *JAMA Oncol*  
44 286 2017;3(7):961-68. doi: 10.1001/jamaoncol.2016.6914
- 45  
46 287 [dataset] 14. Koornstra RH, Peters M, Donofrio S, et al. Management of fatigue in patients with cancer  
47 288 -- a practical overview. *Cancer Treat Rev* 2014;40(6):791-9. doi: 10.1016/j.ctrv.2014.01.004
- 48  
49 289 [dataset] 15. Xiang Y, Guo Z, Zhu P, et al. Traditional Chinese medicine as a cancer treatment: Modern  
50 290 perspectives of ancient but advanced science. *Cancer Med* 2019;8(5):1958-75. doi:  
51 291 10.1002/cam4.2108
- 52  
53 292 [dataset] 16. Oh B, Eade T, Kneebone A, et al. Factors affecting whether or not cancer patients consider  
54 293 using acupuncture. *Acupunct Med* 2017;35(2):107-13. doi: 10.1136/acupmed-2016-011115
- 55  
56 294 [dataset] 17. Zhang Y, Lin L, Li H, et al. Effects of acupuncture on cancer-related fatigue: a meta-analysis.  
57 295 *Support Care Cancer* 2018;26(2):415-25. doi: 10.1007/s00520-017-3955-6
- 58  
59 296 [dataset] 18. Tian ZX, Liu CZ, Qi YS, et al. Transcutaneous electrical acupoint stimulation for stage 1  
297 hypertension: protocol for a randomized controlled pilot trial. *Trials* 2020;21(1):558. doi:

- 1  
2  
3 298 10.1186/s13063-020-04493-x  
4  
5 299 [dataset] 19. Hou L, Zhou C, Wu Y, et al. Transcutaneous electrical acupoint stimulation (TEAS) relieved  
6 300 cancer-related fatigue in non-small cell lung cancer (NSCLC) patients after chemotherapy. *J*  
7 301 *Thorac Dis* 2017;9(7):1959-66. doi: 10.21037/jtd.2017.06.05  
8  
9 302 [dataset] 20. Tu Q, Yang Z, Gan J, et al. Transcutaneous Electrical Acupoint Stimulation Improves  
10 303 Immunological Function During the Perioperative Period in Patients With Non-Small Cell Lung  
11 304 Cancer Undergoing Video-Assisted Thoracic Surgical Lobectomy. *Technol Cancer Res Treat*  
12 305 2018;17:1533033818806477. doi: 10.1177/1533033818806477  
13  
14 306 [dataset] 21. Hou L, Gu F, Gao G, et al. Transcutaneous electrical acupoint stimulation (TEAS)  
15 307 ameliorates chemotherapy-induced bone marrow suppression in lung cancer patients. *J Thorac*  
16 308 *Dis* 2017;9(3):809-17. doi: 10.21037/jtd.2017.03.12  
17  
18 309 [dataset] 22. Jiang Y, Wang H, Liu Z, et al. Manipulation of and sustained effects on the human brain  
19 310 induced by different modalities of acupuncture: an fMRI study. *PLoS One* 2013;8(6):e66815. doi:  
20 311 10.1371/journal.pone.0066815  
21  
22 312 [dataset] 23. Feng B, Zhang Y, Luo LY, et al. Transcutaneous electrical acupoint stimulation for post-  
23 313 traumatic stress disorder: Assessor-blinded, randomized controlled study. *Psychiatry Clin*  
24 314 *Neurosci* 2019;73(4):179-86. doi: 10.1111/pcn.12810  
25  
26 315 [dataset] 24. Preferred reporting items for systematic review and meta-analysis protocols (PRISMA-P)  
27 316 2015: elaboration and explanation. *BMJ* 2016;354:i4086. doi: 10.1136/bmj.i4086  
28  
29 317 [dataset] 25. Moher D, Shamseer L, Clarke M, et al. Preferred reporting items for systematic review and  
30 318 meta-analysis protocols (PRISMA-P) 2015 statement. *Syst Rev* 2015;4:1. doi: 10.1186/2046-  
31 319 4053-4-1  
32  
33 320 [dataset] 26. Piper BF, Dibble SL, Dodd MJ, et al. The revised Piper Fatigue Scale: psychometric  
34 321 evaluation in women with breast cancer. *Oncol Nurs Forum* 1998;25(4):677-84.  
35  
36 322 [dataset] 27. Higgins JPT, Thomas J, Chandler J, et al. Cochrane Handbook for Systematic Reviews of  
37 323 Interventions version 6.1 (updated September 2020). Cochrane, 2020. Available from  
38 324 [www.training.cochrane.org/handbook](http://www.training.cochrane.org/handbook).  
39  
40 325 [dataset] 28. Higgins JPT, Altman DG, Gotzsche PC, et al. The Cochrane Collaboration's tool for  
41 326 assessing risk of bias in randomised trials. *BMJ* 2011;343:d5928. doi: 10.1136/bmj.d5928  
42 327 [published Online First: 2011/10/20]  
43 328  
44 329

47 **Figure 1** Flow diagram of the study selection process. CRF, cancer-related fatigue;  
48 TEAS, transcutaneous electrical acupoint stimulation.  
49  
50 332

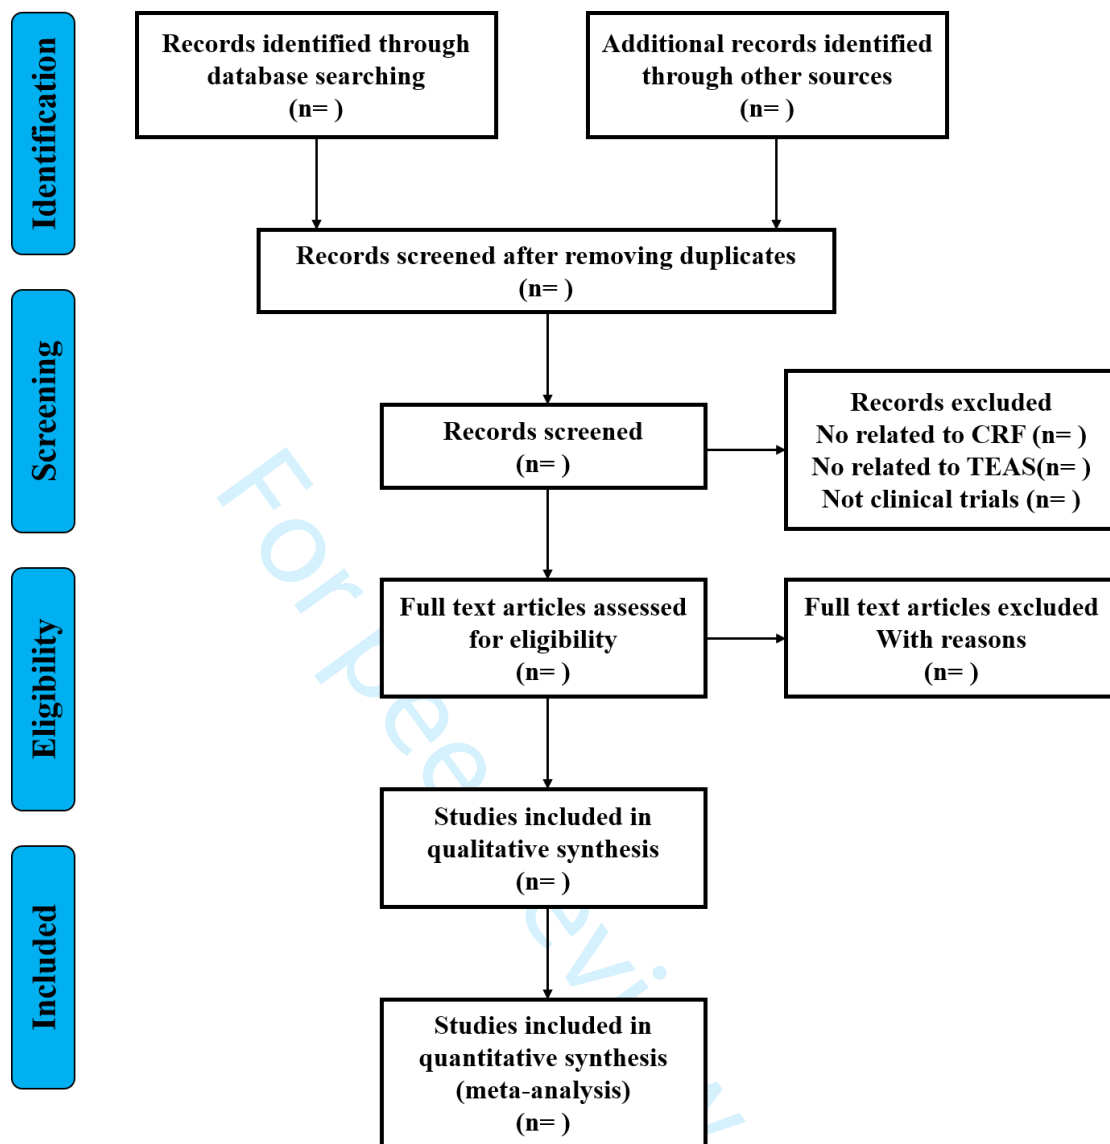

# Reporting checklist for protocol of a systematic review.

Based on the PRISMA-P guidelines.

## Instructions to authors

Complete this checklist by entering the page numbers from your manuscript where readers will find each of the items listed below.

Your article may not currently address all the items on the checklist. Please modify your text to include the missing information. If you are certain that an item does not apply, please write "n/a" and provide a short explanation.

Upload your completed checklist as an extra file when you submit to a journal.

In your methods section, say that you used the PRISMA-Reporting guidelines, and cite them as:

Moher D, Shamseer L, Clarke M, Ghersi D, Liberati A, Petticrew M, Shekelle P, Stewart LA. Preferred Reporting Items for Systematic Review and Meta-Analysis Protocols (PRISMA-P) 2015 statement. Syst Rev. 2015;4(1):1.

|                |                     |                                                                                    | Page   |
|----------------|---------------------|------------------------------------------------------------------------------------|--------|
|                |                     | Reporting Item                                                                     | Number |
| <b>Title</b>   |                     |                                                                                    |        |
| Identification | <a href="#">#1a</a> | Identify the report as a protocol of a systematic review                           | 1      |
| Update         | <a href="#">#1b</a> | If the protocol is for an update of a previous systematic review, identify as such | n/a    |

1 **Registration**

2

3

4 [#2](#) If registered, provide the name of the registry (such as 2

5

6 PROSPERO) and registration number

7

8

9

10 **Authors**

11

12

13 **Contact** [#3a](#) Provide name, institutional affiliation, e-mail address of all 1

14

15 protocol authors; provide physical mailing address of

16

17 corresponding author

18

19

20 **Contribution** [#3b](#) Describe contributions of protocol authors and identify the 8

21

22 guarantor of the review

23

24

25

26 **Amendments**

27

28

29 [#4](#) If the protocol represents an amendment of a previously n/a

30

31 completed or published protocol, identify as such and list

32

33 changes; otherwise, state plan for documenting important

34

35 protocol amendments

36

37

38

39 **Support**

40

41

42 **Sources** [#5a](#) Indicate sources of financial or other support for the review 8

43

44

45 **Sponsor** [#5b](#) Provide name for the review funder and / or sponsor n/a

46

47

48 **Role of sponsor or** [#5c](#) Describe roles of funder(s), sponsor(s), and / or institution(s), 8

49

50 funder

51 if any, in developing the protocol

52

53

54 **Introduction**

55

56

57 **Rationale** [#6](#) Describe the rationale for the review in the context of what is 2-3

58

59

60



|    |                      |                                                                                      |     |
|----|----------------------|--------------------------------------------------------------------------------------|-----|
| 1  |                      | already known                                                                        |     |
| 2  |                      |                                                                                      |     |
| 3  |                      |                                                                                      |     |
| 4  | Objectives           | <a href="#">#7</a> Provide an explicit statement of the question(s) the review will  | 3   |
| 5  |                      | address with reference to participants, interventions,                               |     |
| 6  |                      | comparators, and outcomes (PICO)                                                     |     |
| 7  |                      |                                                                                      |     |
| 8  |                      |                                                                                      |     |
| 9  |                      |                                                                                      |     |
| 10 |                      |                                                                                      |     |
| 11 | <b>Methods</b>       |                                                                                      |     |
| 12 |                      |                                                                                      |     |
| 13 |                      |                                                                                      |     |
| 14 | Eligibility criteria | <a href="#">#8</a> Specify the study characteristics (such as PICO, study design,    | 3-5 |
| 15 |                      | setting, time frame) and report characteristics (such as years                       |     |
| 16 |                      | considered, language, publication status) to be used as                              |     |
| 17 |                      | criteria for eligibility for the review                                              |     |
| 18 |                      |                                                                                      |     |
| 19 |                      |                                                                                      |     |
| 20 |                      |                                                                                      |     |
| 21 |                      |                                                                                      |     |
| 22 |                      |                                                                                      |     |
| 23 |                      |                                                                                      |     |
| 24 | Information          | <a href="#">#9</a> Describe all intended information sources (such as electronic     | 5   |
| 25 |                      | databases, contact with study authors, trial registers or other                      |     |
| 26 | sources              | grey literature sources) with planned dates of coverage                              |     |
| 27 |                      |                                                                                      |     |
| 28 |                      |                                                                                      |     |
| 29 |                      |                                                                                      |     |
| 30 |                      |                                                                                      |     |
| 31 |                      |                                                                                      |     |
| 32 | Search strategy      | <a href="#">#10</a> Present draft of search strategy to be used for at least one     | 11  |
| 33 |                      | electronic database, including planned limits, such that it                          |     |
| 34 |                      | could be repeated                                                                    |     |
| 35 |                      |                                                                                      |     |
| 36 |                      |                                                                                      |     |
| 37 |                      |                                                                                      |     |
| 38 |                      |                                                                                      |     |
| 39 | Study records -      | <a href="#">#11a</a> Describe the mechanism(s) that will be used to manage           | 6   |
| 40 |                      | records and data throughout the review                                               |     |
| 41 | data management      |                                                                                      |     |
| 42 |                      |                                                                                      |     |
| 43 |                      |                                                                                      |     |
| 44 |                      |                                                                                      |     |
| 45 | Study records -      | <a href="#">#11b</a> State the process that will be used for selecting studies (such | 6   |
| 46 |                      | as two independent reviewers) through each phase of the                              |     |
| 47 | selection process    | review (that is, screening, eligibility and inclusion in meta-                       |     |
| 48 |                      | analysis)                                                                            |     |
| 49 |                      |                                                                                      |     |
| 50 |                      |                                                                                      |     |
| 51 |                      |                                                                                      |     |
| 52 |                      |                                                                                      |     |
| 53 |                      |                                                                                      |     |
| 54 | Study records -      | <a href="#">#11c</a> Describe planned method of extracting data from reports         | 5-6 |
| 55 |                      | (such as piloting forms, done independently, in duplicate), any                      |     |
| 56 | data collection      |                                                                                      |     |
| 57 |                      |                                                                                      |     |
| 58 |                      |                                                                                      |     |
| 59 |                      |                                                                                      |     |
| 60 |                      |                                                                                      |     |

|    |                    |                      |                                                                                 |     |
|----|--------------------|----------------------|---------------------------------------------------------------------------------|-----|
| 1  | process            |                      | processes for obtaining and confirming data from investigators                  |     |
| 2  |                    |                      |                                                                                 |     |
| 3  |                    |                      |                                                                                 |     |
| 4  | Data items         | <a href="#">#12</a>  | List and define all variables for which data will be sought                     | 5   |
| 5  |                    |                      | (such as PICO items, funding sources), any pre-planned data                     |     |
| 6  |                    |                      | assumptions and simplifications                                                 |     |
| 7  |                    |                      |                                                                                 |     |
| 8  |                    |                      |                                                                                 |     |
| 9  |                    |                      |                                                                                 |     |
| 10 |                    |                      |                                                                                 |     |
| 11 | Outcomes and       | <a href="#">#13</a>  | List and define all outcomes for which data will be sought,                     | 4-5 |
| 12 |                    |                      |                                                                                 |     |
| 13 | prioritization     |                      | including prioritization of main and additional outcomes, with                  |     |
| 14 |                    |                      | rationale                                                                       |     |
| 15 |                    |                      |                                                                                 |     |
| 16 |                    |                      |                                                                                 |     |
| 17 |                    |                      |                                                                                 |     |
| 18 |                    |                      |                                                                                 |     |
| 19 | Risk of bias in    | <a href="#">#14</a>  | Describe anticipated methods for assessing risk of bias of                      | 7   |
| 20 |                    |                      |                                                                                 |     |
| 21 | individual studies |                      | individual studies, including whether this will be done at the                  |     |
| 22 |                    |                      | outcome or study level, or both; state how this information will                |     |
| 23 |                    |                      | be used in data synthesis                                                       |     |
| 24 |                    |                      |                                                                                 |     |
| 25 |                    |                      |                                                                                 |     |
| 26 |                    |                      |                                                                                 |     |
| 27 |                    |                      |                                                                                 |     |
| 28 |                    |                      |                                                                                 |     |
| 29 | Data synthesis     | <a href="#">#15a</a> | Describe criteria under which study data will be quantitatively                 | 7   |
| 30 |                    |                      | synthesised                                                                     |     |
| 31 |                    |                      |                                                                                 |     |
| 32 |                    |                      |                                                                                 |     |
| 33 |                    |                      |                                                                                 |     |
| 34 | Data synthesis     | <a href="#">#15b</a> | If data are appropriate for quantitative synthesis, describe                    | 7   |
| 35 |                    |                      | planned summary measures, methods of handling data and                          |     |
| 36 |                    |                      | methods of combining data from studies, including any                           |     |
| 37 |                    |                      | planned exploration of consistency (such as I <sup>2</sup> , Kendall's $\tau$ ) |     |
| 38 |                    |                      |                                                                                 |     |
| 39 |                    |                      |                                                                                 |     |
| 40 |                    |                      |                                                                                 |     |
| 41 |                    |                      |                                                                                 |     |
| 42 |                    |                      |                                                                                 |     |
| 43 |                    |                      |                                                                                 |     |
| 44 | Data synthesis     | <a href="#">#15c</a> | Describe any proposed additional analyses (such as                              | 7   |
| 45 |                    |                      | sensitivity or subgroup analyses, meta-regression)                              |     |
| 46 |                    |                      |                                                                                 |     |
| 47 |                    |                      |                                                                                 |     |
| 48 |                    |                      |                                                                                 |     |
| 49 | Data synthesis     | <a href="#">#15d</a> | If quantitative synthesis is not appropriate, describe the type                 | 7   |
| 50 |                    |                      | of summary planned                                                              |     |
| 51 |                    |                      |                                                                                 |     |
| 52 |                    |                      |                                                                                 |     |
| 53 |                    |                      |                                                                                 |     |
| 54 | Meta-bias(es)      | <a href="#">#16</a>  | Specify any planned assessment of meta-bias(es) (such as                        | 8   |
| 55 |                    |                      | publication bias across studies, selective reporting within                     |     |
| 56 |                    |                      |                                                                                 |     |
| 57 |                    |                      |                                                                                 |     |
| 58 |                    |                      |                                                                                 |     |
| 59 |                    |                      |                                                                                 |     |
| 60 |                    |                      |                                                                                 |     |

studies)

1  
2  
3  
4 Confidence in [#17](#) Describe how the strength of the body of evidence will be 8  
5  
6 cumulative assessed (such as GRADE)  
7  
8 evidence  
9

10  
11 The PRISMA-P checklist is distributed under the terms of the Creative Commons Attribution License  
12  
13 CC-BY 4.0. This checklist was completed on 9. July 2021 using <https://www.goodreports.org/>, a tool  
14  
15 made by the [EQUATOR Network](#) in collaboration with [Penelope.ai](#)  
16  
17  
18  
19  
20  
21  
22  
23  
24  
25  
26  
27  
28  
29  
30  
31  
32  
33  
34  
35  
36  
37  
38  
39  
40  
41  
42  
43  
44  
45  
46  
47  
48  
49  
50  
51  
52  
53  
54  
55  
56  
57  
58  
59  
60
